# Supplementary material for: Synthesis and electrochemical properties of high performance yolk-structured LiMn2O4microspheres for lithium ion batteries
Source: Royal Society of Chemistry journal article supplement (doi:10.1039/c2ta00204c), 2012-10-25
Supplement: c2ta00204c.pdf [file c2ta00204c.pdf]

Cite this: DOI: 10.1039/c0xx00000x

www.rsc.org/xxxxxx

ARTICLE TYPE

## Supplementary Information

DOI: 10.1039/b000000x

Yu Qiao, Si-Rong Li, Yan Yu and Chun-Hua Chen

CAS Key Laboratory of Materials for Energy Conversion, Department of Materials Science and Engineering, University of Science and Technology of China, Anhui Hefei 230026, China. Fax: + 86 (0)551 3601592; Tel: + 86 (0)551 3606971; E-mail: cchchen@ustc.edu.cn

### Sample Surface Morphology

The surface morphology is one of the most important feature of the yolk-structured  $\text{LiMn}_2\text{O}_4$  microspheres. To prove the micro-porosity shell which was formed through the oxidation reaction, the SEM images with larger magnification about its surface morphology is shown in **Fig. S1**.

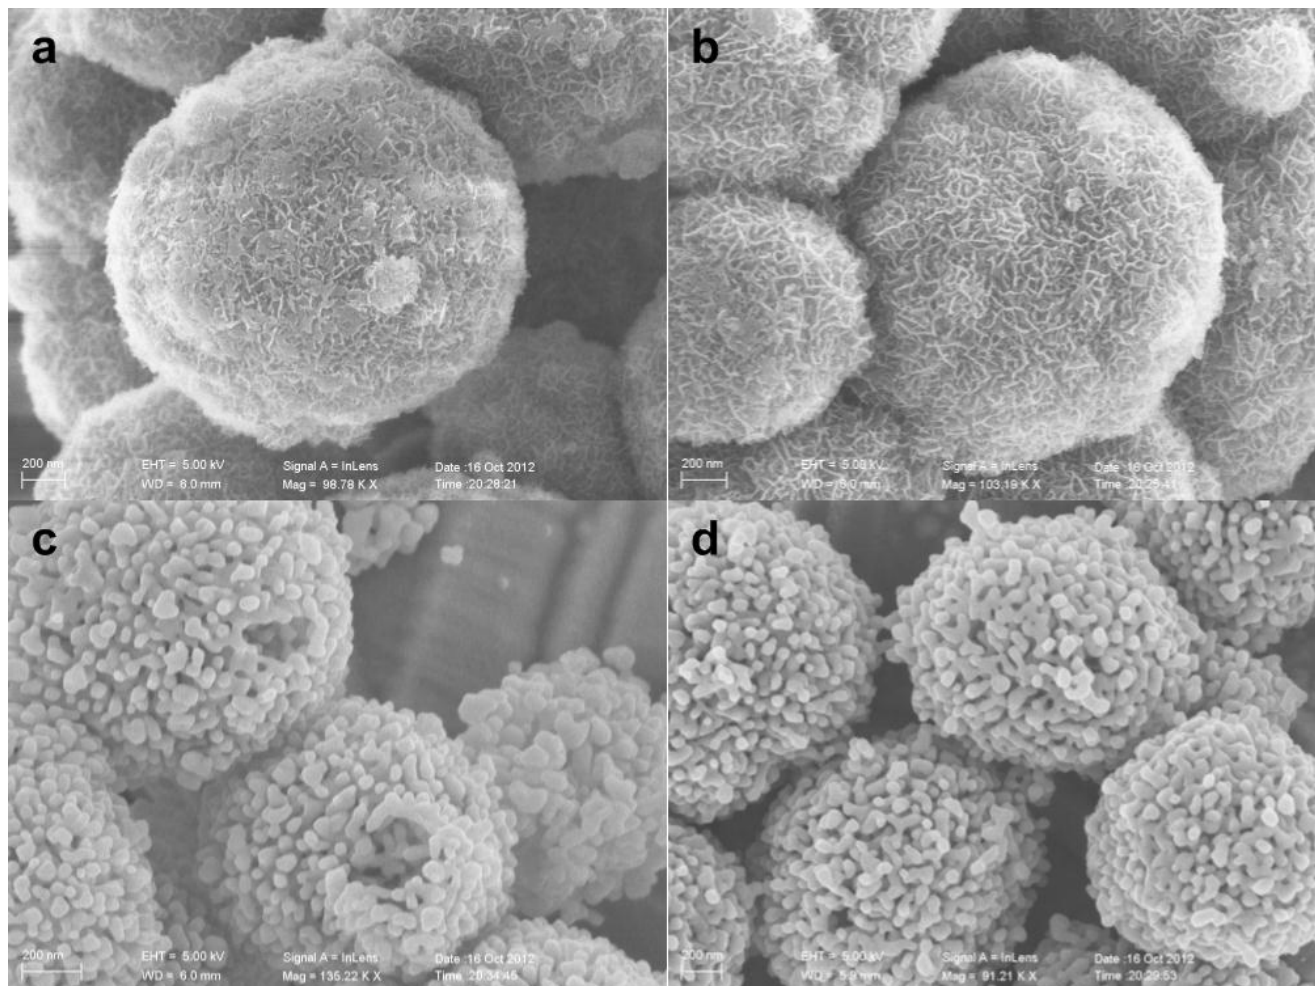

**Fig. S1** SEM images of microspheres of (a) core-shell-structured  $\text{MnCO}_3\text{-MnO}_2$ , (b) yolk-structured  $\text{MnCO}_3$  (core)- $\text{MnO}_2$  (shell), (c) yolk-structured  $\text{Mn}_2\text{O}_3$  and (d) yolk-structured  $\text{LiMn}_2\text{O}_4$ .

As shown in **Fig. S1**, indeed there are some micropores on the surface of the yolk-structured  $\text{MnCO}_3$  (core)- $\text{MnO}_2$  (shell). These micropores correspond exactly to the micro-porosity of the  $\text{MnO}_2$  shell formed by the oxidation reaction product. Meanwhile, the

particles (about 150  $\mu\text{m}$  in diameter ) on the surface of yolk-structured  $\text{LiMn}_2\text{O}_4$  and the pores between them can also prove the existence of surface micropores.

## Electrode Thickness Measurement

The three  $\text{LiMn}_2\text{O}_4$  samples should have different tap densities due to their different particle morphologies. From macroscopic view, the three samples with same mass should have different volumes. To prove this point, we chose each electrode laminate with about same mass (each with about 6.2 mg active material) to compare their thickness.

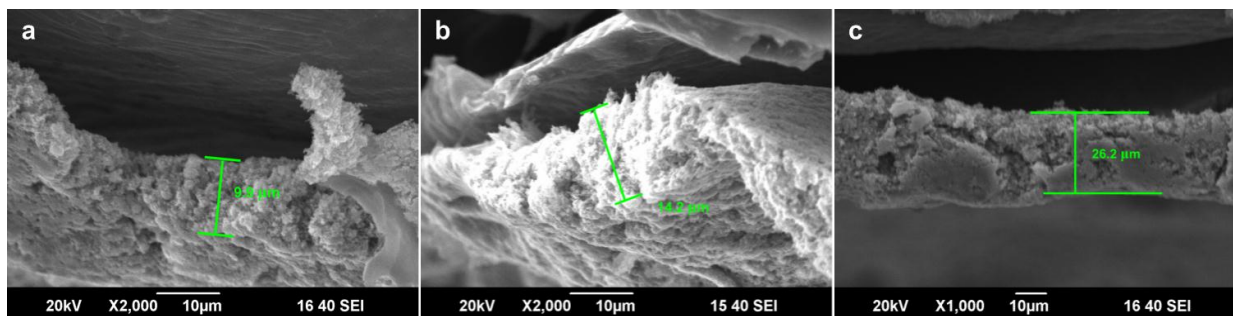

**Fig. S2** SEM images of the electrode thickness of the three samples, (a) LMO-S, (b) LMO-Y, (c) LMO-H.

As shown in **Fig. S2**, the electrode thickness of the three samples is different one another. The LMO-S electrode is the thinnest (nearly 10  $\mu\text{m}$ ), because the solid structure has the highest density. At the same time, LMO-H electrode is the thickest (26.2  $\mu\text{m}$ ) due to its hollow structure, while the thickness of LMO-Y electrode is nearly 14.2  $\mu\text{m}$  (middle of the three) which is also consistent with its particle-structure mentioned before.

## Different Synthetic Conditions for Yolk-structured $\text{LiMn}_2\text{O}_4$

### Sample Preparation and Characterization

To find out the well-optimized conditions for synthesizing the yolk-structured  $\text{LiMn}_2\text{O}_4$  microspheres, different concentration of HCl and  $\text{KMnO}_4$  (**Table S1**) is also tried during the synthetic procedures as a comparison.

**Table S1** The different conditions in the synthetic process

|        | Concentration of $\text{KMnO}_4$ (mol $\text{L}^{-1}$ ) | Concentration of HCl ( mol $\text{L}^{-1}$ ) |
|--------|---------------------------------------------------------|----------------------------------------------|
| yolk-A | 0.064                                                   | 0.6                                          |
| yolk-B | 0.032                                                   | 0.6                                          |
| yolk-C | 0.032                                                   | 1.2                                          |

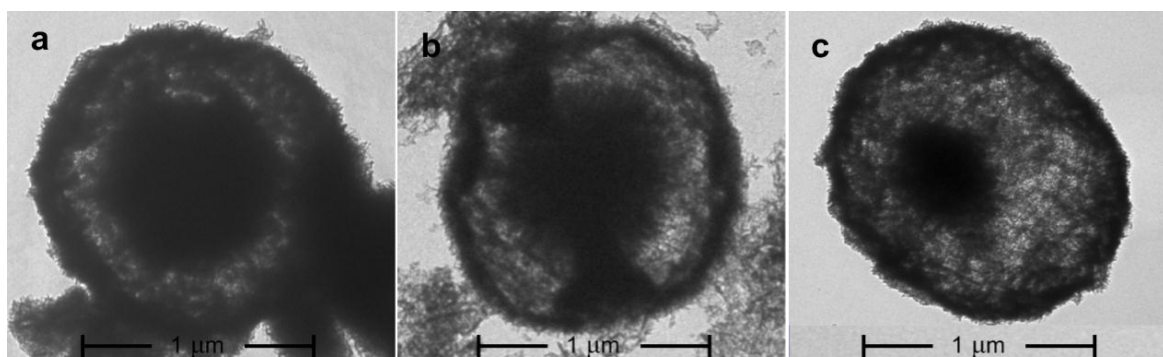

**Fig. S3** TEM images of the  $\text{LiMn}_2\text{O}_4$  microsphere synthesized in different conditions, (a) yolk-A, (b) yolk-B, (c) yolk-C.

As it shown in **Fig. S3**, yolk-A own the thickest shell because the larger concentration of  $\text{KMnO}_4$  is employed duration the oxidation process, while sample yolk-C performs the smallest core radius mainly depends on the larger concentration of  $\text{HCl}$  duration the procedure of etch.

### Cell Test Results

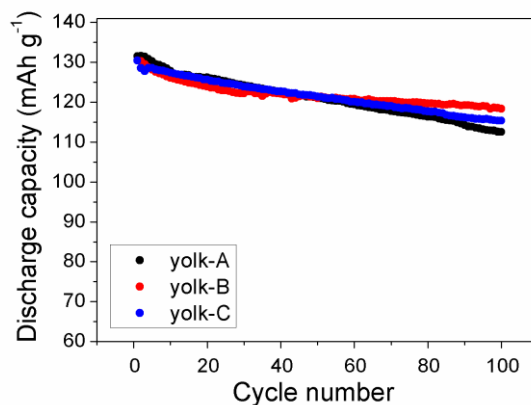

**Fig. S4** Cycling performances of the three  $\text{LiMn}_2\text{O}_4$  samples at  $55^\circ\text{C}$  at 1C rate

**Fig. S4** reveals the cycle performance of the three yolk-structured  $\text{LiMn}_2\text{O}_4$  samples at  $55^\circ\text{C}$  at 1C rate between 3.2 V and 4.35 V. Through the figure above, we can easily find out the yolk-B sample performs the best retention of capacities after 100 cycles. Its excellent cycle performance at 1C rate and elevated temperature presents the well-optimized conditions for synthesizing the yolk-structured  $\text{LiMn}_2\text{O}_4$  microspheres.
